# Supplementary material for: Electronic spectroscopy of cationic adamantane clusters and dehydrogenated adamantane in helium droplets
Source: Royal Society of Chemistry journal article supplement (doi:10.1039/d2cp03523e), 2022-01-01
Supplement: d2cp03523e1.pdf [file d2cp03523e1.pdf]

## Supporting Information

### Electronic spectroscopy of cationic adamantane clusters and dehydrogenated adamantane in helium droplets

Miriam Kappe<sup>1</sup>, Arne Schiller<sup>1</sup>, Serge A. Krasnokutski<sup>2</sup>, Milan Ončák<sup>1,\*</sup>, Paul Scheier<sup>1</sup>, and Ethan M. Cunningham<sup>1\*</sup>

1. Institut für Ionenphysik und Angewandte Physik, Universität Innsbruck,  
Technikerstraße 25, 6020 Innsbruck, Austria
2. Laboratory Astrophysics Group of the MPI for Astronomy at the University of Jena,  
Helmholtzweg 3, D-07743 Jena, Germany

Corresponding authors: [milan.oncak@uibk.ac.at](mailto:milan.oncak@uibk.ac.at), [ethan.cunningham@uibk.ac.at](mailto:ethan.cunningham@uibk.ac.at)

**Table S1** – Excitation energies  $E$  (in eV) and oscillator strengths  $f$  in (Adam)<sup>+</sup> calculated using various methods in the structure optimized at the B3LYP+D3/aug-cc-pVDZ level.

| state          | EOMCCSD/<br>aug-cc-pVDZ |        | TD-BHandHLYP/<br>aug-cc-pVDZ |        | TD-CAMB3LYP/<br>aug-cc-pVDZ |        | TD-B3LYP/<br>aug-cc-pVDZ |        |
|----------------|-------------------------|--------|------------------------------|--------|-----------------------------|--------|--------------------------|--------|
|                | $E$                     | $f$    | $E$                          | $f$    | $E$                         | $f$    | $E$                      | $f$    |
| E              | 1.27                    | 0.0042 | 1.25                         | 0.0063 | 1.16                        | 0.0026 | 1.08                     | 0.0009 |
| E              | 1.89                    | 0.0366 | 1.79                         | 0.0311 | 1.80                        | 0.0321 | 1.83                     | 0.0293 |
| E              | 2.61                    | 0.0003 | 2.60                         | 0.0003 | 2.44                        | 0.0004 | 2.33                     | 0.0010 |
| A <sub>2</sub> | 2.70                    | 0.0000 | 2.69                         | 0.0000 | 2.49                        | 0.0000 | 2.31                     | 0.0000 |
| A <sub>1</sub> | 4.04                    | 0.0891 | 3.89                         | 0.0799 | 3.83                        | 0.0750 | 3.80                     | 0.0615 |
| E              | 4.37                    | 0.0122 | 4.23                         | 0.0101 | 4.04                        | 0.0122 | 3.80                     | 0.0128 |
| E              | 4.77                    | 0.0011 | 4.66                         | 0.0012 | 4.46                        | 0.0002 | 4.18                     | 0.0000 |
| A <sub>2</sub> | 4.84                    | 0.0000 | 4.79                         | 0.0000 | 4.55                        | 0.0000 | 4.27                     | 0.0000 |
| E              | 6.25                    | 0.0021 | 6.05                         | 0.0017 | 5.79                        | 0.0016 | 5.43                     | 0.0014 |

**Table S2** – Excitation energies  $E$  (in eV) and oscillator strengths  $f$  in C<sub>10</sub>H<sub>15</sub><sup>+</sup>, isomer 1, calculated using various methods in the structure optimized at the B3LYP+D3/aug-cc-pVDZ level.

| state          | EOMCCSD/<br>aug-cc-pVDZ |        | TD-BHandHLYP/<br>aug-cc-pVDZ |        | TD-BHandHLYP/<br>aug-cc-pVTZ |        | TD-CAMB3LYP/<br>aug-cc-pVDZ |        | TD-B3LYP/<br>aug-cc-pVDZ |        | TD-B3LYP/TZVP |        |
|----------------|-------------------------|--------|------------------------------|--------|------------------------------|--------|-----------------------------|--------|--------------------------|--------|---------------|--------|
|                | $E$                     | $f$    | $E$                          | $f$    | $E$                          | $f$    | $E$                         | $f$    | $E$                      | $f$    | $E$           | $f$    |
| E              | 4.92                    | 0.0103 | 5.14                         | 0.0069 | 5.15                         | 0.0070 | 4.75                        | 0.0041 | 4.31                     | 0.0014 | 4.31          | 0.0013 |
| E              | 5.72                    | 0.0590 | 6.01                         | 0.0447 | 6.01                         | 0.0444 | 5.60                        | 0.0453 | 5.17                     | 0.0438 | 5.17          | 0.0452 |
| A <sub>2</sub> | 6.32                    | 0.0000 | 6.57                         | 0.0000 | 6.57                         | 0.0000 | 6.02                        | 0.0000 | 5.56                     | 0.0000 | 5.56          | 0.0000 |
| E              | 6.57                    | 0.0076 | 6.71                         | 0.0116 | 6.70                         | 0.0114 | 6.29                        | 0.0101 | 5.89                     | 0.0053 | 5.89          | 0.0055 |

**Table S3** – Excitation energies  $E$  (in eV) and oscillator strengths  $f$  in C<sub>10</sub>H<sub>15</sub><sup>+</sup>, isomer 2, calculated using various methods in the structure optimized at the B3LYP+D3/aug-cc-pVDZ level.

| state | EOMCCSD/<br>aug-cc-pVDZ |        | TD-BHandHLYP/<br>aug-cc-pVDZ |        | TD-BHandHLYP/<br>aug-cc-pVTZ |        | TD-CAMB3LYP/<br>aug-cc-pVDZ |        | TD-B3LYP/<br>aug-cc-pVDZ |        | TD-B3LYP/TZVP |        |
|-------|-------------------------|--------|------------------------------|--------|------------------------------|--------|-----------------------------|--------|--------------------------|--------|---------------|--------|
|       | $E$                     | $f$    | $E$                          | $f$    | $E$                          | $f$    | $E$                         | $f$    | $E$                      | $f$    | $E$           | $f$    |
| A'    | 4.47                    | 0.0121 | 4.68                         | 0.0113 | 4.70                         | 0.0113 | 4.23                        | 0.0096 | 3.71                     | 0.0076 | 3.71          | 0.0079 |
| A''   | 4.71                    | 0.0040 | 4.86                         | 0.0033 | 4.88                         | 0.0034 | 4.45                        | 0.0005 | 3.90                     | 0.0001 | 3.89          | 0.0001 |
| A'    | 4.89                    | 0.0287 | 5.06                         | 0.0234 | 5.07                         | 0.0234 | 4.62                        | 0.0194 | 3.94                     | 0.0135 | 3.94          | 0.0140 |
| A''   | 5.17                    | 0.0762 | 5.43                         | 0.0551 | 5.43                         | 0.0549 | 5.08                        | 0.0528 | 4.67                     | 0.0308 | 4.67          | 0.0304 |
| A''   | 5.83                    | 0.0006 | 6.06                         | 0.0016 | 6.07                         | 0.0015 | 5.54                        | 0.0016 | 4.90                     | 0.0107 | 4.90          | 0.0120 |
| A'    | 5.86                    | 0.0024 | 6.00                         | 0.0020 | 6.00                         | 0.0019 | 5.57                        | 0.0024 | 5.05                     | 0.0040 | 5.05          | 0.0042 |
| A''   | 6.15                    | 0.0002 | 6.27                         | 0.0004 | –                            | –      | 5.83                        | 0.0000 | 5.31                     | 0.0005 | 5.31          | 0.0005 |

**Table S4** – Excitation energies  $E$  (in eV) and oscillator strengths  $f$  in (Adam)<sub>2</sub><sup>+</sup> calculated using various methods in the structure optimized at the B3LYP+D3/aug-cc-pVDZ level.

| state | BHandHLYP/<br>6-31g* |        | CAMB3LYP/<br>aug-cc-pVDZ |        | B3LYP/aug-cc-pVDZ |        | BHandHLYP/<br>aug-cc-pVDZ |        | EOMCCSD/<br>6-31g* |        |
|-------|----------------------|--------|--------------------------|--------|-------------------|--------|---------------------------|--------|--------------------|--------|
|       | $E$                  | $f$    | $E$                      | $f$    | $E$               | $f$    | $E$                       | $f$    | $E$                | $f$    |
| A'    | 0.54                 | 0.2098 | 0.49                     | 0.2068 | 0.62              | 0.0003 | 0.52                      | 0.2060 | 0.51               | 0.1799 |
| A'    | 0.73                 | 0.0002 | 0.70                     | 0.0002 | 0.69              | 0.0207 | 0.74                      | 0.0003 | 0.76               | 0.0039 |
| A''   | 0.84                 | 0.0002 | 0.79                     | 0.0001 | 0.67              | 0.0001 | 0.85                      | 0.0002 | 0.87               | 0.0003 |

|     |      |        |      |        |      |        |      |        |      |        |
|-----|------|--------|------|--------|------|--------|------|--------|------|--------|
| A'  | 0.85 | 0.0064 | 0.82 | 0.0058 | 0.80 | 0.1627 | 0.85 | 0.0058 | 0.99 | 0.0015 |
| A'' | 0.88 | 0.0001 | 0.83 | 0.0001 | 0.69 | 0.0000 | 0.89 | 0.0001 | 1.07 | 0.0000 |
| A'' | 1.61 | 0.0006 | 1.60 | 0.0005 | 1.55 | 0.0000 | 1.61 | 0.0006 | -    | -      |
| A'  | 1.79 | 0.0054 | 1.78 | 0.0037 | 1.68 | 0.0045 | 1.79 | 0.0050 | -    | -      |
| A'  | 1.83 | 0.0229 | 1.83 | 0.0210 | 1.73 | 0.0197 | 1.83 | 0.0210 | -    | -      |
| A'' | 1.88 | 0.0334 | 1.85 | 0.0284 | 1.78 | 0.0240 | 1.88 | 0.0308 | -    | -      |
| A'' | 2.15 | 0.0000 | 2.06 | 0.0002 | 1.87 | 0.0005 | 2.15 | 0.0000 | -    | -      |
| A'' | 2.15 | 0.0003 | 2.06 | 0.0003 | 1.91 | 0.0001 | 2.16 | 0.0002 | -    | -      |
| A'  | 2.16 | 0.0034 | 2.09 | 0.0036 | 1.93 | 0.0031 | 2.17 | 0.0034 | -    | -      |
| A'  | 2.20 | 0.0001 | 2.14 | 0.0001 | 1.98 | 0.0003 | 2.21 | 0.0000 | -    | -      |
| A'' | 2.21 | 0.0012 | 2.12 | 0.0004 | 1.92 | 0.0000 | 2.22 | 0.0011 | -    | -      |
| A'' | 2.22 | 0.0000 | 2.13 | 0.0018 | 1.98 | 0.0036 | 2.23 | 0.0000 | -    | -      |
| A'  | 3.36 | 0.0275 | 3.27 | 0.0262 | 3.21 | 0.0247 | 3.34 | 0.0267 | -    | -      |
| A'  | 3.79 | 0.0029 | 3.64 | 0.0027 | 3.44 | 0.0017 | 3.78 | 0.0028 | -    | -      |
| A'' | 3.99 | 0.0030 | 3.84 | 0.0028 | 3.53 | 0.0042 | 3.99 | 0.0027 | -    | -      |
| A'  | 4.02 | 0.0252 | 3.91 | 0.0180 | 3.63 | 0.0147 | 4.01 | 0.0236 | -    | -      |
| A'' | 4.03 | 0.0014 | 3.86 | 0.0014 | 3.54 | 0.0000 | 4.03 | 0.0014 | -    | -      |
| A'  | 4.11 | 0.0005 | 3.99 | 0.0031 | 3.75 | 0.0052 | 4.09 | 0.0002 | -    | -      |
| A'' | 4.31 | 0.0001 | 4.19 | 0.0000 | 3.90 | 0.0002 | 4.32 | 0.0000 | -    | -      |
| A'  | 4.35 | 0.0000 | 4.23 | 0.0008 | 3.91 | 0.0001 | 4.35 | 0.0003 | -    | -      |
| A'  | 4.36 | 0.0008 | 4.25 | 0.0001 | 3.97 | 0.0002 | 4.36 | 0.0006 | -    | -      |
| A'' | 4.39 | 0.0000 | 4.26 | 0.0000 | 3.95 | 0.0001 | 4.40 | 0.0000 | -    | -      |
| A'' | 4.41 | 0.0001 | 4.29 | 0.0002 | 3.98 | 0.0001 | 4.42 | 0.0001 | -    | -      |
| A'' | 4.47 | 0.0000 | 4.32 | 0.0000 | 4.02 | 0.0000 | 4.48 | 0.0000 | -    | -      |
| A'' | 5.67 | 0.0010 | 5.48 | 0.0008 | 5.11 | 0.0007 | 5.66 | 0.0009 | -    | -      |
| A'  | 5.70 | 0.0012 | 5.52 | 0.0023 | 5.06 | 0.0015 | 5.70 | 0.0011 | -    | -      |
| A'' | 5.76 | 0.0000 | 5.57 | 0.0001 | 5.19 | 0.0000 | 5.75 | 0.0000 | -    | -      |
| A'  | 5.77 | 0.0053 | 5.55 | 0.0066 | 5.16 | 0.0019 | 5.77 | 0.0055 | -    | -      |
| A'  | 5.78 | 0.0001 | 5.56 | 0.0004 | 5.16 | 0.0046 | 5.78 | 0.0001 | -    | -      |
| A'  | 5.85 | 0.0029 | 5.64 | 0.0024 | 5.21 | 0.0019 | 5.86 | 0.0027 | -    | -      |
| A'  | 6.07 | 0.0049 | 5.77 | 0.0051 | 5.39 | 0.0044 | 6.05 | 0.0041 | -    | -      |
| A'  | 6.18 | 0.0735 | 5.90 | 0.0653 | 5.51 | 0.0642 | 6.16 | 0.0677 | -    | -      |

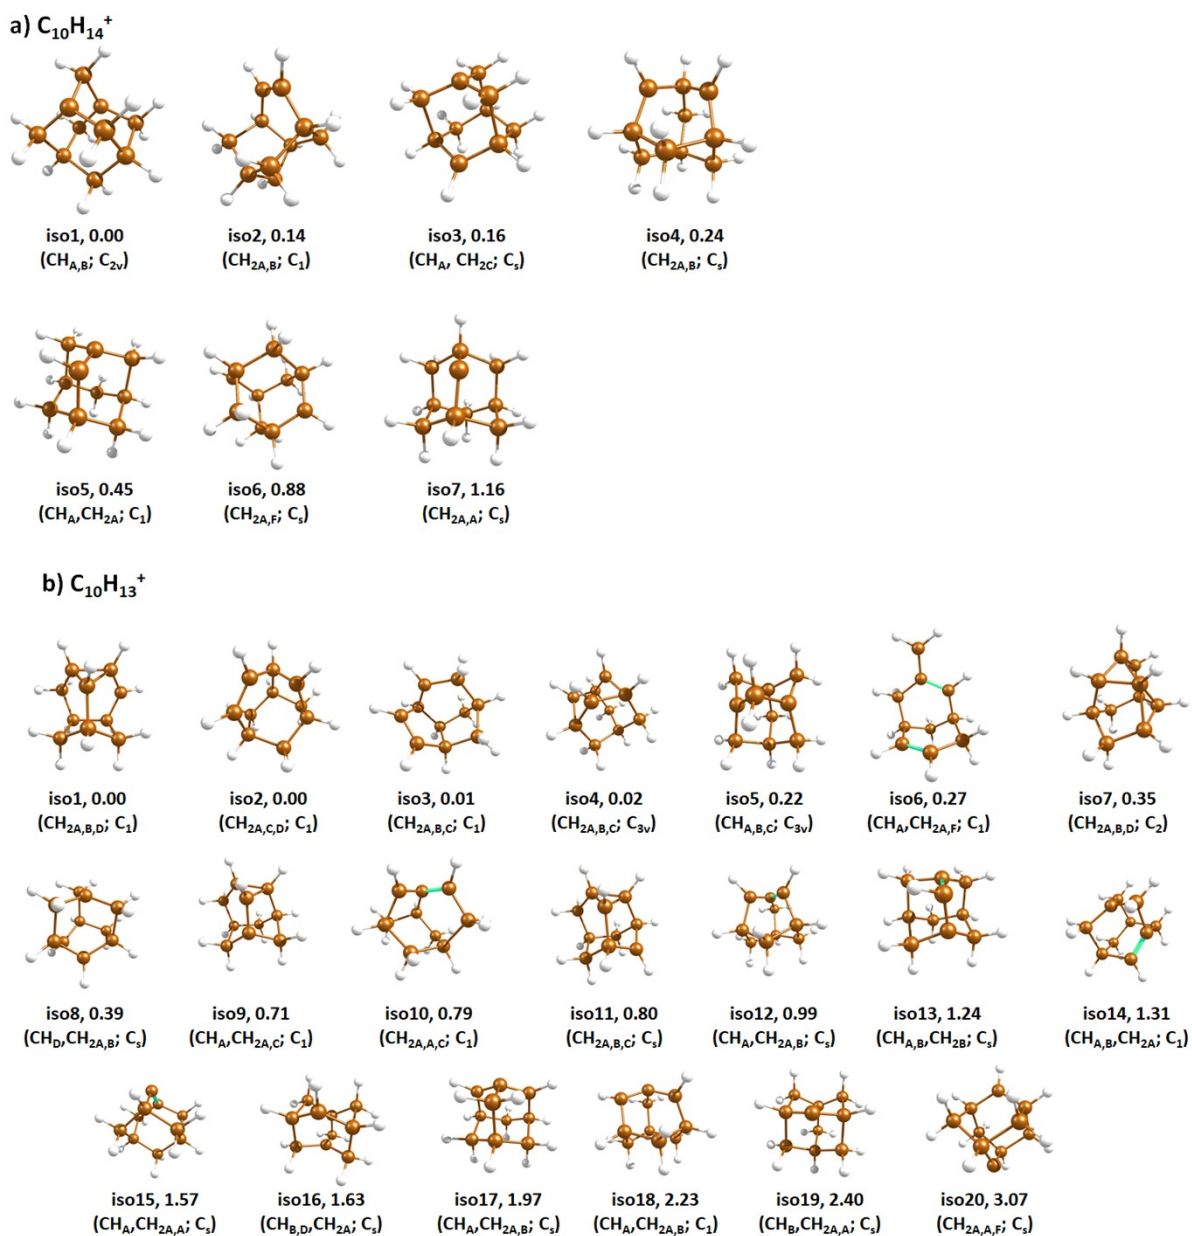

**Figure S1** – All isomers located for a)  $C_{10}H_{14}^+$  and b)  $C_{10}H_{13}^+$  as optimized at the B3LYP+D3/aug-cc-pVDZ level of theory along with the relative energy in eV and the respective symmetry point group. Hydrogens removed from CH and  $CH_2$  groups of (Adam) $^+$  are denoted according to atom nomenclature shown in the manuscript.

**Cartesian coordinates of isomers optimized at the B3LYP+D3/aug-cc-pVDZ level (in Å)  
along with zero-point corrected electronic energies (in Hartree)**

(Adam)+

E = -390.222201

C -0.000000 1.452709 -0.553890  
 C -1.267842 0.731989 -1.003864  
 H -0.000000 2.508488 -0.856128  
 H -2.167697 1.251520 -0.648487  
 H -1.319074 0.761567 -2.108228  
 C -1.258083 -0.726354 -0.553890  
 H -2.172414 -1.254244 -0.856128  
 C -0.000000 -1.463977 -1.003864  
 C -1.264608 -0.730122 1.059172  
 H -0.000000 -2.503041 -0.648487  
 H -0.000000 -1.523135 -2.108228  
 C 1.258083 -0.726354 -0.553890  
 H -1.279839 -1.771178 1.401427  
 C 0.000000 0.000000 1.467714  
 H -2.173804 -0.222784 1.401427  
 H 2.172414 -1.254244 -0.856128  
 C 1.267842 0.731989 -1.003864  
 H 2.167697 1.251520 -0.648487  
 H 1.319074 0.761567 -2.108228  
 H 0.000000 0.000000 2.598167  
 C 1.264608 -0.730122 1.059172  
 C 0.000000 1.460243 1.059172  
 H 2.173804 -0.222784 1.401427  
 H 1.279839 -1.771178 1.401427  
 H 0.893965 1.993962 1.401427  
 H -0.893965 1.993962 1.401427

(Adam)2+

E = -780.792836

C 1.148714 -4.066224 0.000000  
 C 1.752557 -2.611838 0.000000  
 H 2.012504 -4.751006 0.000000  
 H 2.378172 -2.469275 0.890196  
 H 2.378172 -2.469275 -0.890196  
 C 0.554166 -1.646289 0.000000  
 H 1.005380 -0.617700 0.000000  
 C -0.287645 -1.816075 -1.259045  
 C -0.287645 -1.816075 1.259045  
 H -1.121812 -1.099863 -1.280486  
 H 0.318330 -1.657266 -2.160446  
 C -0.879439 -3.266948 -1.258900  
 H -1.121812 -1.099863 1.280486  
 C -0.879439 -3.266948 1.258900  
 H 0.318330 -1.657266 2.160446  
 H -1.491102 -3.395655 -2.161117  
 C 0.306089 -4.254429 -1.262542  
 H -0.089312 -5.282902 -1.298485  
 H 0.921175 -4.118339 -2.162853  
 H -1.491102 -3.395655 2.161117  
 C -1.735404 -3.458177 0.000000

C 0.306089 -4.254429 1.262542  
 H -2.178617 -4.466615 0.000000  
 H -2.580102 -2.752894 0.000000  
 H -0.089312 -5.282902 1.298485  
 H 0.921175 -4.118339 2.162853  
 C 0.904980 3.094747 1.259322  
 C 1.777822 3.173052 0.000000  
 H 1.527058 3.151238 2.161838  
 H 2.370228 4.099061 0.000000  
 H 2.504964 2.343459 0.000000  
 C 0.904980 3.094747 -1.259322  
 H 1.527058 3.151238 -2.161838  
 C 0.073587 1.798775 -1.256423  
 C -0.096824 4.302342 -1.261842  
 H -0.544032 1.723489 -2.161773  
 H 0.770729 0.939511 -1.274925  
 C -0.791455 1.727266 0.000000  
 H -0.720293 4.265547 -2.164948  
 C -0.954682 4.219657 0.000000  
 H 0.482280 5.235971 -1.288728  
 H -1.408601 0.812667 0.000000  
 C 0.073587 1.798775 1.256423  
 H -0.544032 1.723489 2.161773  
 H 0.770729 0.939511 1.274925  
 H -1.672090 5.068616 0.000000  
 C -1.799209 2.933454 0.000000  
 C -0.096824 4.302342 1.261842  
 H -2.440036 2.876571 0.889266  
 H -2.440036 2.876571 -0.889266  
 H -0.720293 4.265547 2.164948  
 H 0.482280 5.235971 1.288728

(Adam)3+

E = -1171.358229

C -0.980104 3.177708 1.483795  
 C -2.081224 2.614537 0.576451  
 H -1.208437 2.967115 2.536516  
 H -2.197155 1.532982 0.738927  
 H -3.050438 3.064951 0.841376  
 C -1.756992 2.899868 -0.894602  
 H -2.538835 2.484790 -1.545038  
 C -1.605318 4.416073 -1.126195  
 C -0.398824 2.211749 -1.261327  
 H -1.372946 4.621828 -2.180384  
 H -2.564234 4.911228 -0.905636  
 C -0.507302 4.977469 -0.214332  
 H -0.160101 2.395097 -2.316480  
 C 0.679504 2.789666 -0.348849  
 H -0.504060 1.127506 -1.121121  
 H -0.380927 6.058525 -0.380154  
 C -0.824709 4.696469 1.258459  
 H -0.036228 5.103328 1.907048

H -1.763827 5.196692 1.543280  
H 1.662829 2.317619 -0.620162  
C 0.854830 4.298227 -0.583197  
C 0.380958 2.494190 1.116201  
H 1.656287 4.704931 0.047540  
H 1.105690 4.505285 -1.631613  
H 1.177145 2.880076 1.766015  
H 0.289941 1.412715 1.293592  
C -1.616896 -1.719308 -0.804189  
C -1.386485 -1.474075 0.696913  
H -0.755325 -1.359496 -1.383363  
H -0.473365 -1.987908 1.030341  
H -1.231383 -0.399440 0.884418  
C -2.595535 -1.975132 1.504863  
H -2.426341 -1.796156 2.576017  
C -3.871837 -1.243747 1.042800  
C -2.769542 -3.496793 1.260973  
H -4.737703 -1.592044 1.623548  
H -3.772718 -0.163040 1.234727  
C -4.102887 -1.493315 -0.457978  
H -3.620585 -3.872635 1.846306  
C -3.000139 -3.744536 -0.239693  
H -1.872381 -4.032323 1.606014  
H -5.015137 -0.975353 -0.788411  
C -2.893846 -0.988464 -1.263981  
H -3.055565 -1.151128 -2.339110  
H -2.773850 0.097139 -1.119487  
H -3.127497 -4.826565 -0.412828  
C -4.276684 -3.015335 -0.702035  
C -1.791445 -3.240236 -1.045456  
H -4.461186 -3.203777 -1.769496  
H -5.150413 -3.385195 -0.146885  
H -1.936911 -3.432015 -2.118136  
H -0.877692 -3.770908 -0.737092  
C 3.795186 -1.292645 1.509237  
C 2.579483 -2.184251 1.215364  
H 4.034128 -1.314958 2.580917  
H 2.796211 -3.220800 1.516843  
H 1.715555 -1.859293 1.813272  
C 2.242306 -2.142115 -0.283235  
H 1.366918 -2.769773 -0.497229  
C 1.901844 -0.670378 -0.678947  
C 3.451251 -2.599046 -1.119069  
H 1.639579 -0.624472 -1.743954  
H 1.033151 -0.340603 -0.098040  
C 3.117445 0.197513 -0.378242  
H 3.209116 -2.571366 -2.191052  
C 4.663961 -1.707309 -0.818767  
H 3.690138 -3.645960 -0.873427  
H 2.877556 1.257731 -0.671411  
C 3.449905 0.181991 1.112243  
H 4.303374 0.837174 1.330112  
H 2.595211 0.525082 1.712166  
H 5.529864 -2.017629 -1.422254  
C 4.324478 -0.230190 -1.223619  
C 5.007852 -1.745525 0.676070  
H 5.190002 0.417102 -1.031831  
H 4.092855 -0.183977 -2.295914

H 5.878885 -1.108985 0.886814  
H 5.285413 -2.771465 0.966779

C10H15+, iso1

E = -389.665579  
C 0.000000 1.441829 1.126583  
C 0.000000 1.449208 -0.500943  
C -1.267299 0.731675 -0.983058  
C -1.255051 -0.724604 -0.500943  
C -1.248660 -0.720914 1.126583  
C 0.000000 0.000000 1.342566  
C -0.000000 -1.463350 -0.983058  
C 1.255051 -0.724604 -0.500943  
C 1.267299 0.731675 -0.983058  
C 1.248660 -0.720914 1.126583  
H 0.000000 2.508610 -0.784443  
H -2.167826 1.251595 -0.630296  
H -1.300301 0.750729 -2.081372  
H -2.172520 -1.254305 -0.784443  
H -0.000000 -2.503190 -0.630296  
H -0.000000 -1.501458 -2.081372  
H -1.234813 -1.756803 1.477746  
H -2.138842 -0.190978 1.477746  
H 2.172520 -1.254305 -0.784443  
H 2.167826 1.251595 -0.630296  
H 1.300301 0.750729 -2.081372  
H 2.138842 -0.190978 1.477746  
H 1.234813 -1.756803 1.477746  
H 0.904029 1.947780 1.477746  
H -0.904029 1.947780 1.477746

C10H15+, iso2

E = -389.648033  
C 0.756032 1.037009 -1.238867  
C -0.003082 1.505552 0.000000  
C 0.756032 1.037009 1.238867  
C 0.756032 -0.606309 1.247372  
C 1.449928 -0.802733 0.000000  
C 0.756032 -0.606309 -1.247372  
C -0.711428 -1.087082 1.254954  
C -1.436330 -0.570766 -0.000000  
C -1.449127 0.970885 -0.000000  
C -0.711428 -1.087082 -1.254954  
H -0.010535 2.607236 0.000000  
H 1.781805 1.423879 1.271387  
H 0.263037 1.292866 2.185658  
H 1.341032 -0.918893 2.118887  
H -0.725848 -2.184174 1.297507  
H -1.196526 -0.721055 2.168815  
H 2.542531 -0.881751 0.000000  
H -2.468230 -0.944280 -0.000000  
H -1.983370 1.346247 -0.883243  
H -1.983370 1.346247 0.883243  
H 1.341032 -0.918893 -2.118887  
H -1.196526 -0.721055 -2.168815  
H -0.725848 -2.184174 -1.297507  
H 0.263037 1.292866 -2.185658  
H 1.781805 1.423879 -1.271387

C10H14+, iso1  
E = -389.024207  
C -1.031048 0.000000 0.833399  
C 0.000000 0.000000 1.931604  
C 1.031048 -0.000000 0.833399  
C 1.247930 -1.260082 0.069949  
C 1.247930 1.260082 0.069949  
C 0.000000 -1.274487 -0.891707  
C 0.000000 1.274487 -0.891707  
C -1.247930 -1.260082 0.069949  
C -0.000000 -0.000000 -1.761558  
C -1.247930 1.260082 0.069949  
H -0.000000 0.911735 2.535546  
H -0.000000 -0.911735 2.535546  
H 2.175467 -1.224230 -0.511587  
H 1.250633 -2.154297 0.704581  
H 2.175467 1.224230 -0.511587  
H 1.250633 2.154297 0.704581  
H 0.000000 -2.185795 -1.504892  
H -2.175467 -1.224230 -0.511587  
H -1.250633 -2.154297 0.704581  
H 0.000000 2.185795 -1.504892  
H -0.881748 0.000000 -2.416320  
H 0.881748 -0.000000 -2.416320  
H -2.175467 1.224230 -0.511587  
H -1.250633 2.154297 0.704581

C10H14+, iso2  
E = -389.019161  
C 0.526307 -0.004496 -1.326627  
C 0.014225 -1.316973 -0.626499  
C -1.346967 -1.315158 -0.116659  
C 0.794235 -1.314111 0.833290  
C -1.879743 -0.115899 0.387405  
C 1.260181 0.141019 0.919952  
C -1.078553 1.114949 0.241234  
C 1.768230 0.394593 -0.505370  
C 0.126654 1.117841 1.284958  
C -0.515592 1.121255 -1.207806  
H 0.753014 -0.216158 -2.376748  
H 0.274734 -2.233675 -1.160544  
H -1.898990 -2.250957 -0.006456  
H 0.185739 -1.636090 1.688540  
H 1.611342 -2.037456 0.717058  
H -2.859355 -0.112543 0.869209  
H 2.041880 0.217357 1.693068  
H 2.072240 1.432436 -0.685760  
H 2.627472 -0.250990 -0.729412  
H -1.694407 1.996047 0.452716  
H 0.513515 2.145777 1.280325  
H -0.256138 0.917465 2.293862  
H -0.048956 2.092575 -1.412786  
H -1.335959 0.998094 -1.926335

C10H14+, iso3  
E = -389.018324  
C -1.296479 -0.417893 0.000000

C -0.853286 -1.041705 1.237767  
C 0.754894 -0.568482 1.241706  
C 1.331226 -1.103898 -0.000000  
C 0.754894 0.978580 1.262855  
C 0.754894 -0.568482 -1.241706  
C 0.070675 1.519131 0.000000  
C -0.853286 -1.041705 -1.237767  
C 0.754894 0.978580 -1.262855  
C -1.462032 1.043747 0.000000  
H -1.293021 -0.627123 2.149406  
H -0.888776 -2.134386 1.241973  
H 1.189329 -1.001929 2.148490  
H 2.007431 -1.958241 -0.000000  
H 1.792948 1.334308 1.307136  
H 0.253332 1.339457 2.170669  
H 1.189329 -1.001929 -2.148490  
H -1.293021 -0.627123 -2.149406  
H -0.888776 -2.134386 -1.241973  
H 0.058398 2.616002 0.000000  
H 0.253332 1.339457 -2.170669  
H 1.792948 1.334308 -1.307136  
H -1.955905 1.427170 -0.898890  
H -1.955905 1.427170 0.898890

C10H14+, iso4  
E = -389.015224  
C -0.860951 -0.185004 1.240650  
C -0.466998 1.227599 0.967699  
C 0.638533 1.508210 -0.000000  
C 1.791659 0.487418 0.000000  
C -0.466998 1.227599 -0.967699  
C 1.216135 -0.934312 0.000000  
C -0.860951 -0.185004 -1.240650  
C 0.367451 -1.135935 1.269910  
C 0.367451 -1.135935 -1.269910  
C -1.743471 -0.549226 -0.000000  
H -1.450784 -0.247878 2.161960  
H -1.037318 2.059308 1.385411  
H 0.937153 2.560857 -0.000000  
H 2.411760 0.671831 -0.886664  
H 2.411760 0.671832 0.886664  
H -1.037318 2.059308 -1.385411  
H 2.043778 -1.656468 0.000000  
H 0.001464 -2.168465 1.340022  
H 0.968706 -0.941693 2.167712  
H -1.450783 -0.247878 -2.161960  
H 0.001465 -2.168465 -1.340022  
H 0.968706 -0.941693 -2.167712  
H -1.979722 -1.622691 -0.000000  
H -2.680030 0.019624 -0.000000

C10H14+, iso5  
E = -389.007546  
C 0.421019 -0.529173 1.198779  
C 0.442108 0.868046 1.453122  
C -0.170294 1.556186 0.237638  
C 0.908277 1.210385 -0.860640  
C -1.524148 0.936839 -0.155651

C 1.024067 -0.312359 -1.024693  
C -1.378509 -0.581159 -0.344097  
C 1.543347 -0.994527 0.379626  
C -0.328755 -0.925099 -1.411162  
C -0.881876 -1.204396 1.042696  
H 1.270846 1.351069 1.975448  
H -0.237293 2.639031 0.392688  
H 0.581422 1.661688 -1.807706  
H 1.878547 1.657102 -0.608163  
H -1.865804 1.397121 -1.092665  
H -2.280376 1.162448 0.606704  
H 1.809040 -0.569466 -1.747023  
H 1.609870 -2.080532 0.257872  
H 2.512660 -0.552748 0.630777  
H -2.346894 -1.045025 -0.569916  
H -0.242214 -2.013056 -1.533052  
H -0.643757 -0.520503 -2.383263  
H -0.783338 -2.290885 0.952517  
H -1.594120 -0.944710 1.832070

C10H14+, iso6

E = -388.991981

C 1.000302 0.000006 1.156936  
C -0.413843 -0.000008 1.663031  
C -1.457833 -0.000014 0.585309  
C -1.269376 1.257319 -0.302011  
C -1.269352 -1.257340 -0.302017  
C 0.143227 1.247605 -0.923975  
C 0.143252 -1.247598 -0.923981  
C 1.254669 1.241757 0.286529  
C 0.530155 0.000010 -1.533019  
C 1.254692 -1.241737 0.286524  
H 1.725691 0.000011 1.984167  
H -0.651646 -0.000009 2.723028  
H -2.467384 -0.000026 1.011828  
H -2.015046 1.283218 -1.108170  
H -1.390705 2.173127 0.288789  
H -2.015023 -1.283251 -1.108175  
H -1.390664 -2.173152 0.288781  
H 0.367025 2.118790 -1.549246  
H 2.274278 1.264518 -0.118664  
H 1.065605 2.189408 0.806200  
H 0.367062 -2.118775 -1.549258  
H 1.295501 0.000019 -2.316748  
H 2.274302 -1.264477 -0.118667  
H 1.065645 -2.189394 0.806189

C10H14+, iso7

E = -388.981729

C 0.804725 -0.602100 1.261842  
C 1.391926 -0.880976 -0.000000  
C 0.804725 -0.602100 -1.261842  
C -0.693205 -1.098968 -1.256346  
C 0.804725 1.021198 -1.245384  
C -1.397655 -0.566725 0.000000  
C 0.056310 1.497702 0.000000  
C -0.693205 -1.098968 1.256346  
C -1.394594 0.975450 0.000000

C 0.804725 1.021198 1.245384  
H 1.375580 -0.956499 2.128454  
H 1.375580 -0.956499 -2.128454  
H -1.157421 -0.722319 -2.177394  
H -0.706714 -2.194821 -1.298148  
H 0.304131 1.298085 -2.182428  
H 1.835587 1.391319 -1.282263  
H -2.434601 -0.931067 0.000000  
H -1.157421 -0.722319 2.177394  
H -0.706714 -2.194821 1.298148  
H 0.055254 2.598528 0.000000  
H -1.926920 1.353374 0.883173  
H -1.926920 1.353374 -0.883173  
H 0.304131 1.298085 2.182428  
H 1.835587 1.391319 1.282263

C10H13+, iso1

E = -388.438261

C 0.936204 0.097358 1.154587  
C -0.593606 0.105324 1.332146  
C -1.465851 -0.650714 0.450219  
C -1.460666 0.936886 0.189666  
C -0.875858 -1.421238 -0.718097  
C -0.669752 1.342379 -0.869161  
C 0.561427 -0.929435 -0.937475  
C 1.390000 1.174821 0.157627  
C 0.596856 0.649320 -1.132891  
C 1.332554 -1.172354 0.380521  
H 1.405328 0.222170 2.137793  
H -0.983977 0.383507 2.311699  
H -2.442629 -0.955889 0.827703  
H -2.317779 1.513463 0.525906  
H -1.511576 -1.301695 -1.604476  
H -0.863829 -2.490612 -0.468334  
H -0.920728 2.250899 -1.422577  
H 2.467204 1.138165 -0.042424  
H 1.133247 2.198024 0.457319  
H 1.014156 -1.414393 -1.807538  
H 1.064516 0.970593 -2.066748  
H 2.417534 -1.207019 0.231265  
H 1.030692 -2.101300 0.877561

C10H13+, iso2

E = -388.438241

C -0.885555 0.085544 1.190188  
C -0.185873 -1.238328 0.894982  
C 1.300379 -1.217632 -0.028507  
C -0.148793 -1.445383 -0.545096  
C 1.819612 0.051537 0.055246  
C -0.881680 -0.221211 -1.168775  
C 0.934615 1.221373 -0.142708  
C -1.851037 0.151527 -0.022858  
C 0.067309 0.964420 -1.410804  
C 0.057845 1.308046 1.155291  
H -1.382686 0.028928 2.166322  
H -0.074163 -2.028974 1.636114  
H 1.920605 -2.094853 0.142616  
H -0.263622 -2.438784 -0.979958



H 2.876586 0.186054 0.299413  
H -1.384679 -0.511339 -2.096947  
H -2.313388 1.137684 -0.147544  
H -2.652284 -0.592505 0.075540  
H 1.528128 2.137122 -0.240114  
H -0.516959 1.865719 -1.635391  
H 0.725544 0.779861 -2.269731  
H -0.522877 2.238815 1.141162  
H 0.698866 1.332915 2.046759

C10H13+, iso3

E = -388.437790

C 0.879791 1.342718 0.231359  
C 1.083272 0.575439 -0.965586  
C -0.074005 -0.392198 -1.277753  
C -0.045644 -1.440823 -0.108853  
C -1.420210 0.340049 -1.099808  
C 1.261597 -1.244885 0.569161  
C -1.512853 0.417848 0.436980  
C 1.896265 -0.074204 0.259233  
C -1.220789 -1.036173 0.850761  
C -0.438546 1.400526 0.963071  
H 1.592777 2.135713 0.464271  
H 1.737549 0.946491 -1.755681  
H 0.062795 -0.853758 -2.259734  
H -0.145735 -2.477323 -0.453100  
H -2.241534 -0.262497 -1.507096  
H -1.443622 1.318954 -1.595572  
H 1.695252 -1.994068 1.236023  
H 2.915124 0.181859 0.534891  
H -2.495718 0.747048 0.792418  
H -0.974104 -1.149577 1.914707  
H -2.086909 -1.674490 0.642456  
H -0.288597 1.316424 2.047633  
H -0.780542 2.435435 0.787393

C10H13+, iso4

E = -388.437458

C 0.000000 1.485355 -0.482539  
C -0.929274 0.536517 -1.178637  
C -1.286355 -0.742678 -0.482539  
C -0.000000 -1.073034 -1.178637  
C -1.261885 -0.728549 1.044016  
C 1.286355 -0.742678 -0.482539  
C 0.000000 0.000000 1.550687  
C 0.929274 0.536517 -1.178637  
C 1.261885 -0.728549 1.044016  
C 0.000000 1.457099 1.044016  
H 0.000000 2.476480 -0.939420  
H -1.337645 0.772290 -2.158955  
H -2.144695 -1.238240 -0.939420  
H -0.000000 -1.544579 -2.158955  
H -1.284429 -1.763610 1.408879  
H -2.169546 -0.230543 1.408879  
H 2.144695 -1.238240 -0.939420  
H 1.337645 0.772290 -2.158955  
H 0.000000 0.000000 2.646603  
H 2.169546 -0.230543 1.408879

H 1.284429 -1.763610 1.408879  
H 0.885116 1.994153 1.408879  
H -0.885116 1.994153 1.408879

C10H13+, iso5

E = -388.430317

C -0.000000 1.105975 -0.482377  
C -1.290949 0.745330 -1.156361  
C -0.957802 -0.552987 -0.482377  
C -0.000000 -1.490659 -1.156361  
C -1.225952 -0.707804 1.004681  
C 0.957802 -0.552987 -0.482377  
C 0.000000 -0.000000 1.651132  
C 1.290949 0.745330 -1.156361  
C 1.225952 -0.707804 1.004681  
C 0.000000 1.415607 1.004681  
H -2.162755 1.248667 -0.738100  
H -1.287055 0.743081 -2.248377  
H -0.000000 -2.497334 -0.738100  
H -0.000000 -1.486163 -2.248377  
H -1.279695 -1.765461 1.286224  
H -2.168782 -0.225518 1.286224  
H 2.162755 1.248667 -0.738100  
H 1.287055 0.743081 -2.248377  
H 0.000000 -0.000000 2.748308  
H 2.168782 -0.225518 1.286224  
H 1.279695 -1.765461 1.286224  
H 0.889087 1.990979 1.286224  
H -0.889087 1.990979 1.286224

C10H13+, iso6

E = -388.428382

C -1.573579 0.151590 0.074692  
C -0.722711 1.224627 -0.282366  
C 0.607217 1.044163 -0.850180  
C 1.612150 1.243734 0.378781  
C 0.814851 -0.357302 -1.444699  
C 1.678868 0.007743 1.234867  
C 0.376305 -1.390611 -0.394126  
C -2.780480 0.496464 0.630223  
C 1.123765 -1.164510 0.906270  
C -1.151315 -1.284088 -0.176236  
H -1.064038 2.244437 -0.078173  
H 0.822108 1.864813 -1.550000  
H 2.587008 1.477595 -0.075847  
H 1.333539 2.122007 0.977828  
H 1.873822 -0.489414 -1.695614  
H 0.236335 -0.466245 -2.371702  
H 2.230458 0.109421 2.171821  
H -3.510218 -0.260571 0.925668  
H -3.056760 1.539554 0.794415  
H 0.595182 -2.402303 -0.759235  
H 1.198209 -2.008529 1.593825  
H -1.470944 -1.907705 0.668537  
H -1.685128 -1.653919 -1.064878

C10H13+, iso7

E = -388.425483

C 0.867016 0.787872 -0.901212  
C 0.089142 -0.484895 -1.314733  
C -1.266702 -0.734273 -0.878281  
C 0.000007 -1.399255 0.000008  
C -2.002182 0.207821 0.046167  
C 1.266703 -0.734249 0.878298  
C -0.867019 0.787892 0.901197  
C 2.002182 0.207825 -0.046167  
C -0.089148 -0.484870 1.314736  
C -0.000002 1.691504 -0.000018  
H 1.229738 1.318449 -1.787768  
H 0.455365 -1.034243 -2.182391  
H -1.819555 -1.528250 -1.383861  
H 0.000013 -2.484678 0.000020  
H -2.722337 -0.364563 0.644911  
H -2.560807 0.970805 -0.512940  
H 1.819557 -1.528210 1.383901  
H 2.560801 0.970820 0.512930  
H 2.722343 -0.364569 -0.644895  
H -1.229743 1.318488 1.787741  
H -0.455356 -1.034181 2.182424  
H 0.650868 2.343956 0.594743  
H -0.650872 2.343945 -0.594790

C10H13+, iso8

E = -388.423981

C -0.661753 -1.174140 0.000006  
C -1.896785 -0.394734 -0.000001  
C -1.294144 1.061287 -0.000009  
C -0.039203 1.339818 0.777840  
C -0.039197 1.339807 -0.777854  
C 0.878332 0.175751 1.178749  
C 0.878336 0.175735 -1.178750  
C 0.066445 -1.248456 1.257497  
C 1.851973 0.065631 0.000002  
C 0.066449 -1.248472 -1.257482  
H -2.501718 -0.522094 -0.903951  
H -2.501721 -0.522082 0.903947  
H -2.071961 1.826292 -0.000016  
H 0.019317 2.259155 1.357131  
H 0.019337 2.259145 -1.357140  
H 1.347581 0.305589 2.159419  
H 0.819853 -2.039504 1.309816  
H -0.577475 -1.245662 2.141106  
H 1.347588 0.305563 -2.159420  
H 2.478091 -0.835415 0.000009  
H 2.515998 0.940855 -0.000003  
H 0.819856 -2.039522 -1.309789  
H -0.577469 -1.245689 -2.141093

C10H13+, iso9

E = -388.412341

C 0.687636 -0.105517 1.093707  
C 0.078167 1.251271 0.938781  
C -1.125729 1.251884 0.001755  
C 0.266498 1.467226 -0.562074  
C -1.867335 -0.049346 -0.197661  
C 1.047292 0.202942 -1.034942

C -0.871483 -1.203570 -0.221731  
C 1.894363 -0.198586 0.275992  
C 0.155131 -1.005666 -1.345237  
C -0.127064 -1.264866 1.303118  
H 0.178125 1.992461 1.731374  
H -1.740367 2.148971 0.071371  
H 0.536816 2.432686 -0.983917  
H -2.413167 -0.038606 -1.152812  
H -2.615905 -0.182258 0.594571  
H 1.755508 0.439004 -1.835877  
H 2.375996 -1.178381 0.225328  
H 2.611711 0.608236 0.464325  
H -1.362451 -2.182018 -0.273497  
H 0.774964 -1.900663 -1.484278  
H -0.393325 -0.846308 -2.284774  
H 0.411493 -2.210899 1.397344  
H -0.944259 -1.156870 2.020593

C10H13+, iso10

E = -388.409353

C -0.654570 -0.455827 -1.219976  
C -0.031776 0.913091 -0.993513  
C 1.264642 1.196988 -0.556193  
C -0.598895 1.562257 0.104541  
C 1.997902 0.088862 0.136084  
C -1.292626 0.454940 0.874062  
C 0.950034 -0.965545 0.602400  
C -1.893543 -0.357965 -0.293838  
C -0.149439 -0.389495 1.564852  
C 0.307084 -1.542365 -0.670599  
H -0.888176 -0.612243 -2.280156  
H 1.619761 2.228094 -0.494808  
H -0.402993 2.571355 0.467357  
H 2.552733 0.530839 0.976483  
H 2.746675 -0.375781 -0.524747  
H -2.007375 0.819580 1.618838  
H -2.259556 -1.340486 0.021981  
H -2.720079 0.185446 -0.768265  
H 1.493963 -1.743263 1.150937  
H -0.653583 -1.235647 2.050483  
H 0.322175 0.200562 2.362651  
H -0.272175 -2.449510 -0.460601  
H 1.075743 -1.808595 -1.407076

C10H13+, iso11

E = -388.408963

C -1.626468 -0.366751 -0.000005  
C -0.667268 -1.252652 -0.765588  
C 0.705089 -0.686545 -1.175909  
C 0.713655 0.955445 -1.251757  
C 1.534440 -0.802717 0.000001  
C 0.024195 1.504237 0.000005  
C 0.705080 -0.686574 1.175906  
C -1.466781 1.137223 0.000013  
C 0.713661 0.955436 1.251761  
C -0.667276 -1.252664 0.765568  
H -2.657800 -0.720184 -0.000009  
H -1.043304 -2.097089 -1.339227

H 1.130129 -1.045417 -2.117781  
H 1.740730 1.325752 -1.359548  
H 0.172473 1.174806 -2.180885  
H 2.627889 -0.751939 0.000018  
H 0.138367 2.598766 0.000011  
H -1.959233 1.565345 0.883718  
H -1.959246 1.565367 -0.883674  
H 1.130110 -1.045441 2.117783  
H 0.172491 1.174790 2.180897  
H 1.740741 1.325730 1.359539  
H -1.043313 -2.097117 1.339188

C10H13+, iso12

E = -388.401877

C 0.758832 1.235967 0.000031  
C -0.451094 1.317781 0.777196  
C -0.911144 -0.131256 1.208700  
C -1.790845 -0.512749 -0.000008  
C 0.316582 -1.053474 1.284922  
C -0.911150 -0.131191 -1.208703  
C 1.149003 -0.937346 -0.000027  
C -0.451086 1.317825 -0.777139  
C 0.316576 -1.053405 -1.284979  
C 1.988393 0.548811 0.000016  
H -0.718411 2.186602 1.378695  
H -1.453059 -0.094370 2.158293  
H -2.042029 -1.581618 -0.000033  
H -2.725511 0.060410 0.000011  
H -0.003500 -2.098795 1.398757  
H 0.934180 -0.815796 2.161030  
H -1.453070 -0.094258 -2.158290  
H -0.718420 2.186684 -1.378574  
H 2.007533 -1.620624 -0.000046  
H 0.934170 -0.815681 -2.161078  
H -0.003507 -2.098719 -1.398869  
H 2.578618 0.590220 -0.918160  
H 2.578611 0.590170 0.918199

C10H13+, iso13

E = -388.392757

C -0.741204 -0.501681 1.019777  
C -1.677711 -0.773236 0.000000  
C -0.741204 -0.501681 -1.019777  
C -0.741204 0.988530 -1.297248  
C 0.585521 -1.173350 -1.210927  
C 0.048161 1.470253 -0.000000  
C 1.431359 -0.670474 0.000000  
C -0.741204 0.988530 1.297248  
C 1.471820 0.872766 -0.000000  
C 0.585521 -1.173350 1.210927  
H -2.628929 -0.236079 0.000000  
H -0.188162 1.254791 -2.203805  
H -1.739046 1.441638 -1.322261  
H 1.025913 -0.860777 -2.164855  
H 0.493029 -2.263934 -1.204106  
H 0.076449 2.568392 -0.000000  
H -0.188162 1.254791 2.203805  
H -1.739046 1.441638 1.322261

H 2.444512 -1.091096 0.000000  
H 2.022686 1.228754 0.880708  
H 2.022686 1.228754 -0.880708  
H 1.025913 -0.860777 2.164855  
H 0.493029 -2.263934 1.204106

C10H13+, iso14

E = -388.390121

C -0.730737 0.126274 -1.106880  
C 0.600045 0.183105 -1.491484  
C 1.543704 0.407651 -0.385815  
C 0.902183 1.449702 0.595656  
C 1.354462 -1.065804 0.287415  
C -0.499598 0.953851 0.702595  
C -0.128962 -1.393525 0.582218  
C -1.451845 1.291196 -0.329164  
C -0.699709 -0.276226 1.524468  
C -1.044550 -1.312859 -0.706546  
H 0.929412 -0.447289 -2.321965  
H 2.595209 0.584369 -0.640484  
H 1.421063 1.423303 1.559510  
H 0.975462 2.457877 0.174805  
H 1.933305 -1.053049 1.221851  
H 1.805395 -1.816908 -0.370425  
H -2.496777 1.027588 -0.154840  
H -1.333208 2.249799 -0.834462  
H -0.204618 -2.379857 1.062045  
H -1.754257 -0.467812 1.754516  
H -0.128255 -0.231150 2.458357  
H -2.099808 -1.501377 -0.473847  
H -0.712874 -2.025686 -1.469842

C10H13+, iso15

E = -388.380396

C -1.350410 0.396874 0.000000  
C -1.391559 -0.918740 0.000000  
C -0.120515 -1.628244 -0.000000  
C 0.621416 -1.049050 -1.288082  
C 0.621416 -1.049050 1.288082  
C 0.621416 0.485122 -1.266444  
C 0.621416 0.485122 1.266444  
C -0.866707 1.007864 -1.303652  
C 1.326831 1.014428 0.000000  
C -0.866707 1.007864 1.303652  
H -0.165740 -2.720594 -0.000000  
H 1.643023 -1.448228 -1.239955  
H 0.153753 -1.443511 -2.197832  
H 1.643023 -1.448228 1.239955  
H 0.153753 -1.443511 2.197832  
H 1.117009 0.862649 -2.171891  
H -0.935693 2.100850 -1.276118  
H -1.398346 0.629995 -2.181954  
H 1.117009 0.862649 2.171891  
H 1.330553 2.112707 0.000000  
H 2.376108 0.691234 -0.000000  
H -0.935693 2.100850 1.276118  
H -1.398346 0.629995 2.181954

C10H13+, iso16  
E = -388.378335  
C -0.030292 1.127497 -0.000000  
C -1.466169 1.476616 -0.000000  
C -1.141627 -0.028509 0.000000  
C -0.863915 -0.835726 -1.223602  
C -0.863915 -0.835726 1.223602  
C 0.818535 -0.660412 -1.272650  
C 0.818535 -0.660412 1.272650  
C 0.818535 0.881609 -1.252810  
C 1.137871 -1.289435 0.000000  
C 0.818535 0.881609 1.252810  
H -1.909420 1.868138 0.915839  
H -1.909420 1.868138 -0.915839  
H -1.191626 -1.877657 -1.175266  
H -1.166964 -0.402849 -2.182172  
H -1.191626 -1.877657 1.175266  
H -1.166964 -0.402849 2.182172  
H 1.235018 -1.172875 -2.146316  
H 1.821100 1.313525 -1.154815  
H 0.373935 1.276117 -2.173481  
H 1.235018 -1.172875 2.146316  
H 1.399347 -2.351463 0.000000  
H 1.821100 1.313525 1.154815  
H 0.373935 1.276117 2.173481

C10H13+, iso17  
E = -388.366021  
C 0.787034 0.000000 1.226239  
C 0.062622 1.201615 1.117565  
C -1.019383 1.251328 0.137237  
C 0.067256 1.247131 -1.098071  
C -1.892458 -0.000000 0.058876  
C 0.980623 0.000000 -1.064742  
C -1.019383 -1.251328 0.137237  
C 1.939256 0.000000 0.240723  
C 0.067256 -1.247131 -1.098071  
C 0.062622 -1.201615 1.117565  
H 0.570727 2.135686 1.378035  
H -1.595506 2.181013 0.112312  
H -0.567262 1.235876 -1.996350  
H 0.642724 2.179963 -1.109863  
H -2.468099 -0.000000 -0.874826  
H -2.614891 -0.000000 0.885951  
H 1.628186 0.000000 -1.951667  
H 2.570381 -0.898154 0.262463  
H 2.570381 0.898154 0.262463  
H -1.595506 -2.181013 0.112312  
H 0.642724 -2.179963 -1.109863  
H -0.567262 -1.235876 -1.996350  
H 0.570727 -2.135686 1.378035

C10H13+, iso18  
E = -388.356260  
C 0.414828 0.353846 1.390099  
C -0.882419 -0.217354 1.376359  
C -1.316393 -0.923852 0.201817  
C -1.589204 0.606299 -0.480982

C -0.244074 -1.655432 -0.604797  
C -0.292092 1.412928 -0.600887  
C 1.047503 -0.818711 -0.647116  
C 0.508897 1.538007 0.663153  
C 0.783579 0.504210 -1.391496  
C 1.550192 -0.562318 0.815175  
H -1.637909 0.150455 2.076345  
H -2.281938 -1.434050 0.262470  
H -1.975503 0.319470 -1.468433  
H -2.384390 1.142724 0.045572  
H -0.616405 -1.851380 -1.618076  
H -0.067111 -2.632999 -0.136531  
H -0.454073 2.338152 -1.169055  
H 1.469299 2.053854 0.581987  
H 1.829214 -1.374646 -1.184022  
H 1.711598 1.068966 -1.540915  
H 0.353379 0.317606 -2.385828  
H 2.510559 -0.035647 0.818289  
H 1.658377 -1.488242 1.390251

C10H13+, iso19  
E = -388.349985  
C -0.103349 1.382189 -0.000000  
C -0.829198 1.135046 1.215822  
C -0.829198 -0.573286 1.216740  
C -1.234515 -1.181181 -0.000000  
C 0.703492 -1.022742 1.257136  
C -0.829198 -0.573286 -1.216740  
C 1.407632 -0.490228 0.000000  
C -0.829198 1.135046 -1.215822  
C 0.703492 -1.022742 -1.257136  
C 1.357972 1.090784 0.000000  
H -0.324446 1.416098 2.144137  
H -1.878845 1.439998 1.212910  
H -1.342937 -0.864622 2.139013  
H 0.788185 -2.110983 1.336833  
H 1.113141 -0.589165 2.178870  
H -1.342937 -0.864622 -2.139013  
H -0.324446 1.416098 -2.144137  
H -1.878845 1.439998 -1.212910  
H 2.458186 -0.809720 0.000000  
H 1.113141 -0.589165 -2.178870  
H 0.788185 -2.110983 -1.336833  
H 1.862015 1.474737 -0.893997  
H 1.862015 1.474737 0.893997

C10H13+, iso20  
E = -388.325371  
C 0.065659 1.256910 -0.973218  
C 0.139614 -0.012824 -1.607469  
C -0.049735 -1.265476 -0.967877  
C 1.249034 -1.300957 0.007544  
C -1.354334 -1.202715 -0.082079  
C 1.223861 -0.049153 0.904356  
C -1.298139 0.058755 0.811110  
C 1.355365 1.193968 0.003866  
C -0.067261 0.007562 1.670262  
C -1.243981 1.312409 -0.092787

H 0.163870 2.116482 -1.647458  
H -0.023822 -2.137028 -1.633131  
H 1.132337 -2.234172 0.572936  
H 2.164519 -1.366508 -0.592388  
H -1.380775 -2.122823 0.515196  
H -2.234214 -1.195817 -0.737597  
H 2.090245 -0.086145 1.580041

H 1.317281 2.134384 0.567936  
H 2.275395 1.180347 -0.592604  
H -2.208204 0.101185 1.423476  
H -0.103754 0.007859 2.755989  
H -1.193864 2.236724 0.496523  
H -2.119505 1.374642 -0.751156
